# Supplementary material
Source: PubMed Central journal article supplement (PMC7377693)
Supplement: mmc1.pdf [file mmc1.pdf]

## Supplementary appendix

This appendix formed part of the original submission and has been peer reviewed. We post it as supplied by the authors.

Supplement to: Naik SS, Gowda GS, Shivaprakash P, et al. Homeless people with mental illness in India and COVID-19. *Lancet Psychiatry* 2020; **7**: e51–52.

**Mental health-care facility and recommendation for inpatient care of homeless people with mental illness\***

| <b>Zones</b>               | <b>Mental Health facility</b>                                                                      | <b>Recommendations for inpatient care</b>                                                                                                                                                                                 |
|----------------------------|----------------------------------------------------------------------------------------------------|---------------------------------------------------------------------------------------------------------------------------------------------------------------------------------------------------------------------------|
| High Risk Zone             | Out-Patient Department<br>Psychiatry Short Stay Ward<br>and Emergency Services                     | Mandatory COVID-19 testing for homeless people with mental illness<br><br>All positive patients need to be sent to COVID-19 designated hospitals<br><br>Admit to the monitoring zone, only after tested COVID-19 negative |
| Monitoring (for risk) Zone | Quarantine Ward<br>Observation Ward<br>High Dependency Ward<br>Electro Convulsive Therapy Services | Monitor for 2 weeks;<br><br>COVID-19 re-testing only if COVID-19 symptoms appear<br><br>If no COVID-19 symptoms develop, then shift to Clean Zone                                                                         |
| Clean Zone                 | Inpatient wards                                                                                    | Daily screening and monitoring of HCWs, support staff, security staff, patients and Caregivers                                                                                                                            |

*\* – No reliable information available regarding travel/exposure to confirmed or suspected COVID-19 case/visit to a COVID-19 health-care facility*
